# Supplementary material for: Type II Secretion-Dependent Aminopeptidase LapA and Acyltransferase PlaC Are Redundant for Nutrient Acquisition during Legionella pneumophila Intracellular Infection of Amoebas
Source: PubMed Central journal article supplement (PMC5904407; doi:10.1128/mbio.00528-18), 2018-04-17
Supplement: mbo002183833st1.pdf [file mbo002183833st1.pdf]

**Table S1A: Conservation of T2SS apparatus genes among *L. pneumophila* strains.**

| Strain         | Source        | Percent identity to the <i>lsp</i> gene of <i>L. pneumophila</i> strain 130b |             |             |             |             |             |             |             |             |             |             |                  |
|----------------|---------------|------------------------------------------------------------------------------|-------------|-------------|-------------|-------------|-------------|-------------|-------------|-------------|-------------|-------------|------------------|
|                |               | <i>lspC</i>                                                                  | <i>lspD</i> | <i>lspE</i> | <i>lspF</i> | <i>lspG</i> | <i>lspH</i> | <i>lspI</i> | <i>lspJ</i> | <i>lspK</i> | <i>lspL</i> | <i>lspM</i> | <i>lspO/pilD</i> |
| 130b           | clinical      | 100                                                                          | 100         | 100         | 100         | 100         | 100         | 100         | 100         | 100         | 100         | 100         | 100              |
| Paris          | clinical      | 99.41                                                                        | 99.37       | 98.79       | 98.50       | 100         | 94.57       | 97.6        | 99.02       | 97.20       | 97.63       | 97.44       | 98.95            |
| Lens           | clinical      | 100                                                                          | 99.49       | 98.79       | 99.25       | 100         | 98.91       | 99.2        | 100         | 99.07       | 99.21       | 99.36       | 99.65            |
| Philadelphia-1 | clinical      | 99.41                                                                        | 99.12       | 98.99       | 98.25       | 100         | 98.37       | 99.2        | 99.51       | 98.45       | 98.94       | 98.72       | 99.65            |
| Sudbury        | clinical      | 100                                                                          | 99.12       | 98.99       | 98.25       | 100         | 98.37       | 99.2        | 99.51       | 98.45       | 98.94       | 98.72       | 99.65            |
| Thunderbay     | clinical      | 100                                                                          | 99.12       | 98.99       | 98.25       | 100         | 98.21       | 99.2        | 99.51       | 98.45       | 98.94       | 98.72       | 99.65            |
| Detroit-1      | clinical      | 100                                                                          | 97.35       | 96.36       | 96.49       | 98.57       | 91.30       | 92.8        | 93.66       | 92.55       | 89.71       | 94.87       | 91.29            |
| ATCC 43290     | clinical      | 100                                                                          | 99.12       | 98.99       | 98.25       | 100         | 98.37       | 99.2        | 99.51       | 98.45       | 98.94       | 98.72       | 99.65            |
| LPE509         | environmental | 99.41                                                                        | 99.12       | 98.99       | 98.25       | 100         | 98.37       | 99.2        | 99.51       | 98.45       | 98.94       | 98.72       | 99.65            |
| Lorraine       | clinical      | 100                                                                          | 99.49       | 98.79       | 98.75       | 100         | 95.11       | 97.6        | 99.02       | 98.76       | 98.42       | 98.72       | 99.30            |
| Mississauga    | clinical      | 98.82                                                                        | 98.74       | 98.58       | 98.50       | 100         | 96.20       | 96          | 99.02       | 98.45       | 97.89       | 98.08       | 96.52            |
| Toronto-2005   | clinical      | 100                                                                          | 99.37       | 98.99       | 98.50       | 100         | 95.11       | 97.6        | 99.02       | 97.83       | 98.42       | 97.44       | 98.61            |
| Corby          | clinical      | 99.41                                                                        | 98.74       | 98.58       | 98.50       | 100         | 96.20       | 96          | 99.02       | 98.14       | 97.89       | 98.08       | 98.61            |
| ATCC 33215     | clinical      | 99.41                                                                        | 99.12       | 98.99       | 98.25       | 100         | 98.37       | 99.2        | 99.51       | 98.45       | 98.94       | 98.72       | 99.65            |
| Alcoy          | clinical      | 100                                                                          | 98.74       | 98.58       | 98.50       | 100         | 96.20       | 96          | 99.02       | 98.14       | 97.89       | 98.08       | 98.61            |
| ATCC 43283     | clinical      | 100                                                                          | 98.74       | 98.58       | 98.75       | 100         | 93.48       | 97.6        | 99.02       | 98.14       | 97.89       | 98.08       | 96.52            |
| ATCC 33737     | environmental | 99.41                                                                        | 96.21       | 96.76       | 96.24       | 99.29       | 89.13       | 92.8        | 94.63       | 94.41       | 89.45       | 96.15       | 88.85            |

**Table S1B: Conservation of T2SS apparatus genes within the *Legionella* genus.<sup>a</sup>**

| Species                | Strain         | Source        | Percent identity to the <i>lsp</i> gene of <i>L. pneumophila</i> strain 130b |             |             |             |             |             |             |                      |             |             |             |                  |
|------------------------|----------------|---------------|------------------------------------------------------------------------------|-------------|-------------|-------------|-------------|-------------|-------------|----------------------|-------------|-------------|-------------|------------------|
|                        |                |               | <i>lspC</i>                                                                  | <i>lspD</i> | <i>lspE</i> | <i>lspF</i> | <i>lspG</i> | <i>lspH</i> | <i>lspI</i> | <i>lspJ</i>          | <i>lspK</i> | <i>lspL</i> | <i>lspM</i> | <i>lspO/pilD</i> |
| <i>pneumophila</i>     | 130b           | clinical      | 100                                                                          | 100         | 100         | 100         | 100         | 100         | 100         | 100                  | 100         | 100         | 100         | 100              |
| <i>adelaidensis</i>    | ATCC49625      | environmental | 65.00                                                                        | 63.06       | 77.32       | 71.68       | 83.94       | 45.40       | 59.65       | 51.52                | 50.33       | 38.88       | 44.08       | 61.38            |
| <i>anisa</i>           | WA-316-C3      | environmental | 63.91                                                                        | 75.00       | 88.69       | 82.71       | 94.20       | 61.01       | 73.50       | 70.65                | 58.17       | 61.38       | 63.06       | 68.29            |
| <i>birminghamensis</i> | CDC#1407-AL-14 | clinical      | 41.29                                                                        | 67.82       | 79.39       | 76.94       | 87.59       | 46.25       | 60.33       | 58.91                | 49.02       | 40.89       | 43.51       | 58.04            |
| <i>bozemanii</i>       | WIGA           | clinical      | 61.31                                                                        | 76.10       | 89.07       | 83.21       | 94.93       | 59.12       | 73.50       | 70.71                | 57.00       | 61.38       | 61.78       | 68.64            |
| <i>brunensis</i>       | ATCC43878      | environmental | 46.11                                                                        | 66.91       | 83.20       | 77.69       | 85.40       | 51.68       | 72.95       | 68.47                | 52.94       | 44.19       | 47.10       | 60.74            |
| <i>cherrii</i>         | ORW            | environmental | 61.18                                                                        | 75.57       | 89.70       | 81.45       | 94.93       | 61.40       | 70.69       | 69.85                | 57.10       | 61.48       | 61.15       | 72.13            |
| <i>cincinnatiensis</i> | CDC#72-OH-14   | clinical      | 56.81                                                                        | 75.47       | 87.88       | 81.70       | 93.48       | 61.54       | 68.55       | 71.14                | 59.48       | 58.05       | 63.46       | 69.69            |
| <i>drancourtii</i>     | LLAP12         | environmental | 62.72                                                                        | 74.30       | 89.29       | 83.58       | 92.75       | 65.69       | 71.67       | partial <sup>b</sup> | 70.94       | 59.37       | 66.67       | 67.60            |
| <i>drozanskii</i>      | ATCC700990     | environmental | 60.78                                                                        | 64.66       | 83.00       | 79.20       | 86.86       | 45.46       | 72.41       | 68.14                | 52.27       | 48.18       | 45.16       | 65.13            |
| <i>dumoffii</i>        | NY-23          | environmental | 60.36                                                                        | 75.28       | 89.29       | 80.95       | 94.93       | 62.58       | 73.50       | 69.19                | 57.98       | 60.42       | 61.78       | 72.13            |
| <i>erythra</i>         | SE-32A-C8      | environmental | 47.65                                                                        | 71.00       | 78.50       | 77.19       | 89.05       | 46.15       | 64.80       | 55.45                | 47.71       | 40.84       | 44.87       | 63.64            |
| <i>feeleei</i>         | WO-44C         | environmental | 60.95                                                                        | 70.44       | 81.74       | 80.15       | 84.67       | 45.75       | 72.17       | 58.91                | 51.47       | 43.72       | 45.16       | 61.19            |
| <i>geestiana</i>       | ATCC49504      | environmental | 54.29                                                                        | 65.47       | 77.89       | 71.68       | 82.86       | 44.67       | 54.39       | 52.53                | 40.00       | 34.65       | 37.82       | 48.23            |
| <i>gomanii</i>         | LS-13          | environmental | 60.00                                                                        | 75.28       | 89.50       | 82.71       | 93.48       | 58.62       | 66.67       | 71.14                | 60.59       | 61.91       | 59.62       | 71.78            |
| <i>gratiana</i>        | ATCC49413      | environmental | 58.58                                                                        | 74.72       | 88.69       | 82.46       | 92.75       | 62.13       | 68.55       | 72.86                | 59.67       | 57.52       | 64.74       | 67.73            |
| <i>hackeliae</i>       | 798-PA-H       | clinical      | 44.05                                                                        | 66.88       | 82.59       | 77.19       | 84.67       | 48.41       | 73.91       | 67.98                | 55.12       | 44.07       | 47.68       | 56.79            |
| <i>israelensis</i>     | Bercovier 4    | environmental | 58.58                                                                        | 68.48       | 81.71       | 74.62       | 81.30       | 53.79       | 67.50       | 65.84                | 48.69       | 46.31       | 44.87       | 64.69            |
| <i>jamestowniensis</i> | JA-26-G1-E2    | environmental | 59.05                                                                        | 66.29       | 83.43       | 77.89       | 85.40       | 50.97       | 71.05       | 62.56                | 51.79       | 42.56       | 44.81       | 59.72            |
| <i>jordanis</i>        | BL-540         | environmental | 57.14                                                                        | 66.42       | 82.79       | 75.94       | 83.94       | 47.74       | 67.83       | 61.77                | 50.65       | 42.34       | 41.45       | 61.13            |
| <i>lansingensis</i>    | ATCC49751      | clinical      | 47.13                                                                        | 66.22       | 83.43       | 78.95       | 83.21       | 46.15       | 68.64       | 68.63                | 53.75       | 46.39       | 48.68       | 59.09            |
| <i>londiniensis</i>    | ATCC49505      | environmental | 57.43                                                                        | 66.20       | 79.75       | 72.11       | 78.83       | 51.15       | 60.87       | 53.03                | 48.20       | 40.42       | 39.10       | 61.62            |
| <i>longbeachae</i>     | NSW150         | clinical      | 56.00                                                                        | 74.56       | 88.08       | 81.96       | 93.48       | 63.87       | 69.60       | 71.14                | 58.82       | 59.47       | 64.10       | 68.64            |
| <i>maceachernii</i>    | PX-1-G2-E2     | environmental | 47.62                                                                        | 65.38       | 83.60       | 77.69       | 88.32       | 48.05       | 69.83       | 60.10                | 52.60       | 45.23       | 44.74       | 62.64            |
| <i>micdadei</i>        | TATLOCK        | clinical      | 61.77                                                                        | 67.18       | 84.41       | 79.45       | 86.86       | 46.75       | 74.36       | 62.56                | 52.27       | 45.95       | 42.76       | 64.18            |
| <i>moravica</i>        | ATCC43877      | environmental | 68.64                                                                        | 81.46       | 89.68       | 85.43       | 93.53       | 70.24       | 80.83       | 75.39                | 64.84       | 62.53       | 73.72       | 73.52            |
| <i>nautarum</i>        | ATCC49506      | environmental | 61.77                                                                        | 64.63       | 83.00       | 79.70       | 89.78       | 46.58       | 72.41       | 68.14                | 50.65       | 46.35       | 45.81       | 66.90            |
| <i>oakridgensis</i>    | Oak Ridge-10   | environmental | 60.58                                                                        | 67.13       | 81.41       | 77.14       | 83.57       | 50.85       | 66.96       | 53.96                | 50.33       | 43.75       | 49.03       | 64.79            |
| <i>parisiensis</i>     | PF-209-C-C2    | environmental | 61.31                                                                        | 76.07       | 89.50       | 82.96       | 94.93       | 60.38       | 73.50       | 71.72                | 57.00       | 60.32       | 60.51       | 69.34            |
| <i>quateirensis</i>    | ATCC49507      | environmental | 61.31                                                                        | 76.07       | 89.50       | 82.96       | 94.93       | 60.38       | 73.50       | 71.72                | 57.00       | 60.32       | 60.51       | 69.34            |
| <i>quinlivanii</i>     | CDC#1442-AUS-E | environmental | 41.03                                                                        | 68.58       | 81.82       | 76.44       | 86.86       | 45.75       | 61.02       | 58.50                | 47.71       | 40.31       | 38.96       | 58.54            |
| <i>rubrilucens</i>     | WA-270A-C2     | environmental | 46.47                                                                        | 70.04       | 79.11       | 77.44       | 88.32       | 45.63       | 65.08       | 55.67                | 48.38       | 40.31       | 44.23       | 64.36            |
| <i>sainthelensi</i>    | Mt.St.Helens-4 | environmental | 59.17                                                                        | 75.06       | 88.28       | 82.46       | 92.03       | 59.76       | 69.36       | 71.14                | 60.13       | 59.37       | 63.46       | 70.38            |
| <i>santicrucis</i>     | SC-63-C7       | environmental | 57.40                                                                        | 74.94       | 88.49       | 82.71       | 92.75       | 61.54       | 68.29       | 70.65                | 57.52       | 60.00       | 63.46       | 71.08            |
| <i>shakespearei</i>    | ATCC49655      | environmental | 69.41                                                                        | 84.20       | 87.85       | 86.50       | 93.53       | 70.91       | 79.31       | 77.83                | 66.88       | 60.69       | 67.31       | 71.78            |
| <i>spiritensis</i>     | Mt.St.Helens-9 | environmental | 42.86                                                                        | 69.32       | 81.58       | 78.64       | 86.13       | 47.21       | 67.77       | 56.65                | 53.42       | 44.13       | 45.46       | 62.55            |
| <i>steelei</i>         | IMVS3376       | clinical      | 59.76                                                                        | 75.82       | 88.46       | 81.96       | 93.48       | 63.52       | 70.94       | 70.85                | 59.28       | 59.52       | 65.61       | 71.43            |
| <i>steigerwaltii</i>   | SC-18-C9       | environmental | 61.18                                                                        | 76.20       | 89.68       | 81.70       | 92.75       | 56.22       | 70.16       | 70.20                | 58.69       | 60.58       | 64.97       | 72.13            |
| <i>tucsonensis</i>     | ATCC49180      | clinical      | 63.31                                                                        | 76.13       | 89.09       | 83.46       | 92.75       | 61.78       | 73.28       | 67.16                | 57.66       | 61.38       | 62.42       | 71.08            |
| <i>waltersii</i>       | ATCC51914      | environmental | 63.91                                                                        | 82.24       | 87.25       | 85.18       | 97.14       | 63.10       | 74.14       | 80.10                | 66.99       | 59.00       | 68.59       | 67.02            |
| <i>worsleiensis</i>    | ATCC49508      | environmental | 67.46                                                                        | 79.95       | 88.06       | 85.71       | 92.09       | 69.64       | 78.13       | 73.40                | 60.34       | 57.41       | 67.95       | 69.34            |
| Avg. identity          |                |               | 57.38                                                                        | 71.91       | 85.14       | 79.99       | 89.56       | 55.20       | 69.79       | 66.06                | 55.33       | 51.54       | 54.25       | 65.71            |

<sup>a</sup> Homologues within the *Legionella* genus were conservatively predicted using an E value cutoff of  $<1 \times 10^{-20}$  and an alignment length of at least 80% (Gomez-Valero L, Rusniok C, Rolando M, Neou M, Dervins-Ravault D, Demirtas J, et al. Genome Biol 15:505, 2014).

<sup>b</sup> the *lspJ* gene of *L. drancourtii* lies at the end of a contig, thus we cannot conclude whether the entire gene is intact.
