# Supplementary material for: Type II Secretion-Dependent Aminopeptidase LapA and Acyltransferase PlaC Are Redundant for Nutrient Acquisition during Legionella pneumophila Intracellular Infection of Amoebas
Source: PubMed Central journal article supplement (PMC5904407; doi:10.1128/mbio.00528-18), 2018-04-17
Supplement: mbo002183833st2.pdf [file mbo002183833st2.pdf]

**Table S2A: Presence of *nttD* within *L. pneumophila* and throughout the genus.**

| <i>L. pneumophila</i> strain <sup>a</sup> | % identity | % similarity | % coverage | E value |
|-------------------------------------------|------------|--------------|------------|---------|
| 130b <sup>b</sup>                         | 100        | 100          | 100        | 0       |
| Paris <sup>b</sup>                        | 100        | 100          | 100        | 0       |
| Lens <sup>b</sup>                         | 100        | 100          | 100        | 0       |
| Philadelphia-1 <sup>b</sup>               | 99.74      | 100          | 100        | 0       |
| Sudbury                                   | 99.74      | 100          | 100        | 0       |
| Thunderbay                                | 99.74      | 100          | 100        | 0       |
| Detroit-1                                 | 99.74      | 100          | 100        | 0       |
| ATCC 43290                                | 99.74      | 100          | 100        | 0       |
| LPE509                                    | 99.74      | 100          | 100        | 0       |
| Lorraine                                  | 99.49      | 100          | 100        | 0       |
| Mississauga                               | 98.47      | 99.23        | 100        | 0       |
| Toronto-2005                              | 98.47      | 99.23        | 100        | 0       |
| Corby                                     | 98.47      | 99.23        | 100        | 0       |
| ATCC 33215                                | 98.47      | 99.23        | 100        | 0       |
| Alcoy                                     | 98.21      | 99.23        | 100        | 0       |
| ATCC 43283                                | 98.21      | 99.23        | 100        | 0       |
| ATCC 33737                                | 95.41      | 97.45        | 100        | 0       |

<sup>a</sup> see Table S1 for source designation.

<sup>b</sup> ORF lpw10421 (*nttD*) of strain 130b corresponds to lpg0956 of strain Philadelphia-1, to lpp1018 of strain Paris, and to lpl0985 of strain Lens.

| <i>Legionella</i> species <sup>c</sup> | % identity | % similarity | % coverage | E value   |
|----------------------------------------|------------|--------------|------------|-----------|
| <i>pneumophila</i> <sup>d</sup>        | 95-100     | 97-100       | 100        | 0         |
| <i>quateirensis</i>                    | 70.66      | 85.97        | 100        | 0         |
| <i>moravica</i>                        | 69.90      | 85.46        | 100        | 0         |
| <i>shakespearei</i>                    | 69.90      | 84.69        | 100        | 0         |
| <i>waltersii</i>                       | 69.64      | 84.95        | 100        | 0         |
| <i>worsleiensis</i>                    | 64.89      | 81.42        | 100        | 0         |
| <i>anisa</i>                           | 53.42      | 72.41        | 100        | 3.24E-150 |
| <i>bozemanii</i>                       | 53.17      | 71.90        | 100        | 5.66E-150 |
| <i>parisiensis</i>                     | 53.17      | 71.39        | 100        | 1.66E-147 |
| <i>gormanii</i>                        | 52.78      | 72.22        | 100        | 7.17E-151 |
| <i>tucsonensis</i>                     | 52.66      | 71.39        | 100        | 2.05E-147 |
| <i>steigerwaltii</i>                   | 51.65      | 71.90        | 100        | 4.60E-149 |
| <i>cherrii</i>                         | 51.39      | 69.37        | 100        | 2.98E-141 |
| <i>santicrucis</i>                     | 51.27      | 72.08        | 100        | 8.10E-148 |
| <i>gratiana</i>                        | 51.27      | 72.08        | 100        | 8.45E-148 |
| <i>cincinnatiensis</i>                 | 51.02      | 71.57        | 100        | 3.19E-146 |
| <i>longbeachae</i>                     | 50.76      | 71.07        | 100        | 1.55E-144 |
| <i>sainthelensi</i>                    | 50.40      | 71.77        | 96.68      | 1.46E-140 |
| <i>steelei</i>                         | 49.87      | 70.38        | 100        | 1.71E-140 |
| <i>dumoffii</i>                        | 48.35      | 68.35        | 100        | 3.13E-135 |
| <i>israelensis</i>                     | 46.57      | 67.43        | 100        | 6.42E-128 |
| <i>lansingensis</i>                    | 42.03      | 60.76        | 100        | 2.38E-105 |
| <i>rubrilucens</i>                     | 42.03      | 60.00        | 100        | 4.71E-103 |
| <i>hackeliae</i>                       | 41.88      | 61.93        | 100        | 6.07E-107 |

|                        |       |                  |       |           |
|------------------------|-------|------------------|-------|-----------|
| <i>jamestowniensis</i> | 41.41 | 60.86            | 100   | 1.73E-105 |
| <i>feeleeii</i>        | 41.03 | 60.26            | 99.49 | 9.98E-104 |
| <i>spiritensis</i>     | 40.51 | 59.49            | 99.49 | 9.68E-100 |
| <i>erythra</i>         | 40.36 | 59.14            | 100   | 5.39E-99  |
| <i>brunensis</i>       | 39.95 | 60.81            | 100   | 1.39E-99  |
| <i>nautarum</i>        | 38.69 | 60.22            | 93.62 | 2.34E-83  |
| <i>drozanskii</i>      | 38.48 | 60.21            | 97.45 | 4.48E-90  |
| <i>jordanis</i>        | 38.33 | 57.11            | 100   | 5.38E-89  |
| <i>maceachernii</i>    | 37.63 | 61.36            | 100   | 1.99E-91  |
| <i>birminghamensis</i> | 36.64 | 57.76            | 100   | 1.02E-86  |
| <i>quinlivanii</i>     | 36.61 | 56.23            | 96.17 | 6.86E-79  |
| <i>micdadei</i>        | 36.04 | 58.63            | 100   | 9.78E-90  |
| <i>geestiana</i>       | 31.08 | 50.63            | 100   | 3.32E-61  |
| <i>adelaidensis</i>    |       | no gene detected |       |           |
| <i>drancourtii</i>     |       | no gene detected |       |           |
| <i>londiniensis</i>    |       | no gene detected |       |           |
| <i>oakridgensis</i>    |       | no gene detected |       |           |

<sup>c</sup> see Table S1 for strain and source designation.

<sup>d</sup> based on the 17 representative pneumophila strains appearing at the top of Table S2.

**Table S2B: Presence of *plaC* within *L. pneumophila* and throughout the genus.**

| <i>L. pneumophila</i> strain | % identity | % similarity | % coverage | E value |
|------------------------------|------------|--------------|------------|---------|
| 130b <sup>e</sup>            | 100        | 100          | 100        | 0       |
| Lens <sup>e</sup>            | 100        | 100          | 100        | 0       |
| Toronto-2005                 | 99.77      | 100          | 100        | 0       |
| Paris <sup>e</sup>           | 99.54      | 100          | 100        | 0       |
| Philadelphia-1 <sup>e</sup>  | 99.54      | 100          | 100        | 0       |
| LPE509                       | 99.54      | 100          | 100        | 0       |
| Lorraine                     | 99.54      | 100          | 100        | 0       |
| Mississauga                  | 99.54      | 100          | 100        | 0       |
| Alcoy                        | 99.54      | 100          | 100        | 0       |
| ATCC 43283                   | 99.54      | 100          | 100        | 0       |
| Sudbury                      | 99.54      | 100          | 100        | 0       |
| Thunderbay                   | 99.54      | 100          | 100        | 0       |
| ATCC 43290                   | 99.54      | 100          | 100        | 0       |
| ATCC 33215                   | 99.54      | 100          | 100        | 0       |
| Corby                        | 99.31      | 100          | 100        | 0       |
| Detroit-1                    | 98.15      | 99.54        | 100        | 0       |
| ATCC 33737                   | 97.92      | 99.77        | 100        | 0       |

<sup>e</sup> ORF lpw30971 (*plaC*) of strain 130b corresponds to lpg2837 of strain Philadelphia-1, to lpp2894 of strain Paris, and to lpl2749 of strain Lens.

| <i>Legionella</i> species | % identity | % similarity | % coverage | E value |
|---------------------------|------------|--------------|------------|---------|
| <i>pneumophila</i>        | 97-100     | 99-100       | 100        | 0       |
| <i>waltersii</i>          | 77.55      | 90.05        | 99.8       | 0       |
| <i>quateirensis</i>       | 72.98      | 85.45        | 100        | 0       |

|                        |       |                  |      |           |
|------------------------|-------|------------------|------|-----------|
| <i>moravica</i>        | 72.69 | 85.19            | 99.8 | 0         |
| <i>cincinnatiensis</i> | 72.24 | 85.88            | 98.2 | 0         |
| <i>shakespearei</i>    | 72.22 | 85.65            | 99.8 | 0         |
| <i>santicrucis</i>     | 72.00 | 85.88            | 98.2 | 0         |
| <i>longbeachae</i>     | 72.00 | 85.88            | 98.2 | 0         |
| <i>sainthelensi</i>    | 72.00 | 85.65            | 98.2 | 0         |
| <i>bozemanii</i>       | 71.16 | 83.72            | 99.3 | 0         |
| <i>tucsonensis</i>     | 71.16 | 83.95            | 99.3 | 0         |
| <i>steelei</i>         | 71.16 | 84.19            | 99.3 | 0         |
| <i>cherrii</i>         | 71.06 | 84.94            | 98.2 | 0         |
| <i>anisa</i>           | 70.82 | 83.76            | 98.2 | 0         |
| <i>gormanii</i>        | 70.82 | 84.00            | 98.2 | 0         |
| <i>steigerwaltii</i>   | 70.82 | 85.18            | 98.2 | 0         |
| <i>gratiana</i>        | 70.82 | 85.41            | 98.2 | 0         |
| <i>worsleiensis</i>    | 70.56 | 85.28            | 98.8 | 0         |
| <i>parisiensis</i>     | 70.47 | 83.95            | 99.3 | 0         |
| <i>dumoffii</i>        | 70.47 | 84.19            | 99.3 | 0         |
| <i>drancourtii</i>     | 70.23 | 85.58            | 99.3 | 0         |
| <i>hackeliae</i>       | 67.37 | 80.75            | 98.4 | 0         |
| <i>brunensis</i>       | 67.29 | 81.88            | 98.2 | 0         |
| <i>lansingensis</i>    | 66.59 | 82.12            | 98.2 | 0         |
| <i>jordanis</i>        | 65.41 | 80.71            | 98.2 | 0         |
| <i>jamestowniensis</i> | 65.26 | 79.58            | 98.4 | 0         |
| <i>spiritensis</i>     | 64.37 | 79.81            | 97.2 | 0         |
| <i>erythra</i>         | 63.36 | 78.49            | 97.7 | 0         |
| <i>rubrilucens</i>     | 62.76 | 77.75            | 98.6 | 0         |
| <i>birminghamensis</i> | 62.56 | 76.98            | 99.3 | 0         |
| <i>quinlivanii</i>     | 62.13 | 78.29            | 100  | 0         |
| <i>israelensis</i>     | 62.12 | 77.88            | 98.2 | 0         |
| <i>geestiana</i>       | 53.77 | 69.58            | 97.9 | 4.46E-171 |
| <i>adelaidensis</i>    |       | no gene detected |      |           |
| <i>drozanskii</i>      |       | no gene detected |      |           |
| <i>feelei</i>          |       | no gene detected |      |           |
| <i>londiniensis</i>    |       | no gene detected |      |           |
| <i>maceachernii</i>    |       | no gene detected |      |           |
| <i>micdadei</i>        |       | no gene detected |      |           |
| <i>nautarum</i>        |       | no gene detected |      |           |
| <i>oakridgensis</i>    |       | no gene detected |      |           |

**Table S2C: Presence of *lapA* within *L. pneumophila* and throughout the genus.**

| <i>L. pneumophila</i> strain | % identity | % similarity | % coverage | E value |
|------------------------------|------------|--------------|------------|---------|
| 130b <sup>f</sup>            | 100        | 100          | 100        | 0       |
| Toronto-2005                 | 99.75      | 100          | 100        | 0       |
| Paris <sup>f</sup>           | 99.75      | 100          | 100        | 0       |
| Philadelphia-1 <sup>f</sup>  | 99.75      | 100          | 100        | 0       |
| LPE509                       | 99.75      | 100          | 100        | 0       |

|                   |       |       |     |   |
|-------------------|-------|-------|-----|---|
| Lorraine          | 99.75 | 100   | 100 | 0 |
| Sudbury           | 99.75 | 100   | 100 | 0 |
| Thunderbay        | 99.75 | 100   | 100 | 0 |
| ATCC 43290        | 99.75 | 100   | 100 | 0 |
| ATCC 33215        | 99.75 | 100   | 100 | 0 |
| Alcoy             | 99.50 | 99.50 | 100 | 0 |
| ATCC 43283        | 99.50 | 99.50 | 100 | 0 |
| Corby             | 99.50 | 99.50 | 100 | 0 |
| Lens <sup>f</sup> | 97.01 | 99.50 | 100 | 0 |
| Mississauga       | 97.01 | 99.50 | 100 | 0 |
| Detroit-1         | 96.26 | 99.00 | 100 | 0 |
| ATCC 33737        | 96.26 | 98.50 | 100 | 0 |

<sup>f</sup> ORF lpw30701 (*lapA*) of strain 130b corresponds to lpg2814 of strain Philadelphia-1, to lpp2866 of strain Paris, and to lpl2729 of strain Lens.

| <b>Legionella species</b> | <b>% identity</b> | <b>% similarity</b> | <b>% coverage</b> | <b>E value</b> |
|---------------------------|-------------------|---------------------|-------------------|----------------|
| <i>pneumophila</i>        | 96-100            | 98-100              | 100               | 0              |
| <i>quateirensis</i>       | 79.30             | 88.53               | 95.02             | 0              |
| <i>shakespearei</i>       | 79.05             | 88.78               | 95.02             | 0              |
| <i>moravica</i>           | 78.55             | 89.03               | 95.02             | 0              |
| <i>worsleiensis</i>       | 76.06             | 86.78               | 95.02             | 0              |
| <i>drancourtii</i>        | 75.56             | 85.54               | 95.02             | 0              |
| <i>waltersii</i>          | 75.31             | 87.03               | 95.02             | 0              |
| <i>gormanii</i>           | 71.89             | 83.83               | 95.26             | 0              |
| <i>cherrii</i>            | 69.90             | 82.84               | 95.26             | 0              |
| <i>bozemanii</i>          | 69.65             | 82.84               | 95.26             | 0              |
| <i>tucsonensis</i>        | 69.65             | 83.33               | 95.26             | 0              |
| <i>longbeachae</i>        | 69.58             | 82.79               | 95.02             | 0              |
| <i>parisiensis</i>        | 69.40             | 82.84               | 95.26             | 0              |
| <i>anisa</i>              | 69.15             | 82.84               | 95.26             | 0              |
| <i>santicrucis</i>        | 69.08             | 83.79               | 95.02             | 0              |
| <i>steigerwaltii</i>      | 68.97             | 82.84               | 96.21             | 0              |
| <i>steelei</i>            | 68.91             | 83.33               | 95.26             | 0              |
| <i>cincinnatiensis</i>    | 68.47             | 81.53               | 96.21             | 0              |
| <i>gratiana</i>           | 68.08             | 82.04               | 95.02             | 0              |
| <i>dumoffii</i>           | 67.91             | 82.09               | 95.26             | 0              |
| <i>sainthelensi</i>       | 67.83             | 83.54               | 95.02             | 0              |
| <i>israelensis</i>        | 67.00             | 81.50               | 94.79             | 0              |
| <i>spiritensis</i>        | 66.75             | 81.64               | 95.50             | 0              |
| <i>erythra</i>            | 66.33             | 79.80               | 95.02             | 0              |
| <i>brunensis</i>          | 65.67             | 78.61               | 95.26             | 0              |
| <i>rubrilucens</i>        | 65.59             | 79.05               | 95.02             | 0              |
| <i>lansingensis</i>       | 65.34             | 80.30               | 95.02             | 0              |
| <i>jordanis</i>           | 63.34             | 78.30               | 95.02             | 0              |
| <i>hackeliae</i>          | 63.09             | 78.05               | 95.02             | 0              |
| <i>drozanskii</i>         | 62.40             | 76.21               | 92.65             | 0              |
| <i>jamestowniensis</i>    | 62.34             | 77.06               | 95.02             | 0              |
| <i>birminghamensis</i>    | 61.69             | 74.88               | 95.26             | 0              |
| <i>quinlivanii</i>        | 60.95             | 75.62               | 95.26             | 0              |

|                     |       |                  |       |           |
|---------------------|-------|------------------|-------|-----------|
| <i>micdadei</i>     | 60.85 | 75.56            | 95.02 | 0         |
| <i>nautarum</i>     | 60.35 | 75.31            | 95.02 | 0         |
| <i>feeleeii</i>     | 60.10 | 77.31            | 95.02 | 0         |
| <i>geestiana</i>    | 57.75 | 77.25            | 94.79 | 3.54E-178 |
| <i>oakridgensis</i> | 56.75 | 73.75            | 94.79 | 2.85E-169 |
| <i>adelaidensis</i> | 54.78 | 71.83            | 91.71 | 6.47E-152 |
| <i>londiniensis</i> |       | no gene detected |       |           |
| <i>maceachernii</i> |       | no gene detected |       |           |

**Table S2D: Presence of *lapB* within *L. pneumophila* and throughout the genus.**

| <i>L. pneumophila</i> strain | % identity | % similarity | % coverage | E value |
|------------------------------|------------|--------------|------------|---------|
| 130b <sup>9</sup>            | 100        | 100          | 100        | 0       |
| Lens <sup>9</sup>            | 98.74      | 99.24        | 100        | 0       |
| Toronto-2005                 | 99.24      | 99.50        | 100        | 0       |
| Paris <sup>9</sup>           | 97.73      | 98.49        | 100        | 0       |
| Philadelphia-1 <sup>9</sup>  | 97.48      | 98.74        | 100        | 0       |
| LPE509                       | 97.73      | 98.49        | 100        | 0       |
| Lorraine                     | 97.23      | 98.49        | 100        | 0       |
| Mississauga                  | 98.24      | 98.99        | 100        | 0       |
| Alcoy                        | 98.24      | 98.99        | 100        | 0       |
| ATCC 43283                   | 98.24      | 98.99        | 100        | 0       |
| Sudbury                      | 97.48      | 98.74        | 100        | 0       |
| Thunderbay                   | 97.48      | 98.74        | 100        | 0       |
| ATCC 43290                   | 97.48      | 98.74        | 100        | 0       |
| ATCC 33215                   | 97.48      | 98.74        | 100        | 0       |
| Corby                        | 98.24      | 98.99        | 100        | 0       |
| Detroit-1                    | 89.92      | 95.21        | 100        | 0       |
| ATCC 33737                   | 89.92      | 94.96        | 100        | 0       |

<sup>9</sup> ORF lpw00321 (*lapB*) of strain 130b corresponds to lpg0032 of strain Philadelphia-1, to lpp0031 of strain Paris, and to lpl0032 of strain Lens.

| <i>Legionella</i> species | % identity | % similarity     | % coverage | E value   |
|---------------------------|------------|------------------|------------|-----------|
| <i>pneumophila</i>        | 89-100     | 94-100           | 100        | 0         |
| <i>quateirensis</i>       | 63.98      | 78.34            | 100        | 0         |
| <i>moravica</i>           | 63.57      | 76.63            | 100        | 0         |
| <i>shakespearei</i>       | 62.92      | 78.77            | 98.49      | 0         |
| <i>waltersii</i>          | 61.21      | 76.83            | 100        | 1.19E-180 |
| <i>worsleiensis</i>       | 60.20      | 76.83            | 100        | 0         |
| <i>adelaidensis</i>       |            | no gene detected |            |           |
| <i>anisa</i>              |            | no gene detected |            |           |
| <i>birminghamensis</i>    |            | no gene detected |            |           |
| <i>bozemanii</i>          |            | no gene detected |            |           |
| <i>brunensis</i>          |            | no gene detected |            |           |
| <i>cherrii</i>            |            | no gene detected |            |           |
| <i>cincinnatiensis</i>    |            | no gene detected |            |           |
| <i>drancourtii</i>        |            | no gene detected |            |           |

|                        |                  |
|------------------------|------------------|
| <i>drozanskii</i>      | no gene detected |
| <i>dumoffii</i>        | no gene detected |
| <i>erythra</i>         | no gene detected |
| <i>feeleii</i>         | no gene detected |
| <i>geestiana</i>       | no gene detected |
| <i>gormanii</i>        | no gene detected |
| <i>gratiana</i>        | no gene detected |
| <i>hackeliae</i>       | no gene detected |
| <i>israelensis</i>     | no gene detected |
| <i>jamestowniensis</i> | no gene detected |
| <i>jordanis</i>        | no gene detected |
| <i>lansingensis</i>    | no gene detected |
| <i>londiniensis</i>    | no gene detected |
| <i>longbeachae</i>     | no gene detected |
| <i>maceachernii</i>    | no gene detected |
| <i>micdadei</i>        | no gene detected |
| <i>nautarum</i>        | no gene detected |
| <i>oakridgensis</i>    | no gene detected |
| <i>parisiensis</i>     | no gene detected |
| <i>quinlivanii</i>     | no gene detected |
| <i>rubrilucens</i>     | no gene detected |
| <i>sainthelensi</i>    | no gene detected |
| <i>santicrucis</i>     | no gene detected |
| <i>spiritensis</i>     | no gene detected |
| <i>steelei</i>         | no gene detected |
| <i>steigerwaltii</i>   | no gene detected |
| <i>tucsonensis</i>     | no gene detected |
