# Supplementary material for: Type II Secretion-Dependent Aminopeptidase LapA and Acyltransferase PlaC Are Redundant for Nutrient Acquisition during Legionella pneumophila Intracellular Infection of Amoebas
Source: PubMed Central journal article supplement (PMC5904407; doi:10.1128/mbio.00528-18), 2018-04-17
Supplement: mbo002183833st3.pdf [file mbo002183833st3.pdf]

**Table S3A:** Primers used in this study

| Primer | Description         | Sequence (5' to 3')*               |
|--------|---------------------|------------------------------------|
| RW1    | <i>nttD</i> 5' F    | ATGGTGCCAACATCATGCGT               |
| RW2    | <i>nttD</i> 5' R    | AAAAAACCCGGGTAATGCGAACGACAGCGCCA   |
| RW3    | <i>nttD</i> 3' F    | AAAAAACCCGGGAATCAGGATGACGAGGTTGGCA |
| RW4    | <i>nttD</i> 3' R    | TAGCCAACGCTATGCCCTCAAA             |
| RW5    | <i>nttD</i> compl F | AAAAAAGGTACCAAATGAAAAGTACCCACCTT   |
| RW6    | <i>nttD</i> compl R | AAAAAATCTAGATGCCCTCAAACAAAGTGACA   |
| RW7    | <i>lapA</i> compl F | AAAAGGTACCTGTAGTATATTTGCTCATTGATG  |
| RW8    | <i>lapA</i> compl R | AAAAAAGCTTATTTATGAGAGGCTTTAAAACAG  |
| RW9    | <i>plaC</i> compl F | AAAAGAATTCTGCATTTATTGGATATCGGGATT  |
| RW10   | <i>plaC</i> compl R | AAAAGAATTCCCACTGTTAATGTGGTTCAGGTG  |
| RW11   | <i>plaC</i> scr R   | ACCGCTTCTGCGTTCTGATT               |
| RW12   | <i>lspF</i> qPCR F  | TTCTATTTGCAGCGGGAGTC               |
| RW13   | <i>lspF</i> qPCR R  | GCCTCACTGATTCCAATTCC               |
| RW14   | <i>lipA</i> qPCR F  | CCTTGCACGGTTGGTTAGAT               |
| RW15   | <i>lipA</i> qPCR R  | TCCTGGGGTAAGTGTGAAG                |
| RW16   | <i>lipB</i> qPCR F  | TGCAAGGACAAACAGAGCAG               |
| RW17   | <i>lipB</i> qPCR R  | AGCCAATACTAGCCGCTGAC               |
| RW18   | <i>plaA</i> qPCR F  | GCGCATGTGATGGTTATTTG               |
| RW19   | <i>plaA</i> qPCR R  | ACTCCACACCAGCTTCATCC               |
| RW20   | <i>srnA</i> qPCR F  | CGCTCATCGTGGTGATACTG               |
| RW21   | <i>srnA</i> qPCR R  | CACCAAGATCCCATTCTTGC               |
| RW22   | <i>celA</i> qPCR F  | CAGCACGGCAGTAGAGTTCA               |
| RW23   | <i>celA</i> qPCR R  | ATTACCGGCTTCAGGTTGTG               |
| RW24   | <i>lapB</i> qPCR F  | CCCTCCGTCGTCACTGTAAT               |
| RW25   | <i>lapB</i> qPCR R  | TAGAGTCATCATCGGCACCA               |
| RW26   | <i>lapA</i> qPCR F  | GGTTACCGTGATTGGCAAAG               |
| RW27   | <i>lapA</i> qPCR R  | ATGCTCGATGATCCACTTCC               |
| RW28   | <i>chiA</i> qPCR F  | CTGCATTTTCCCAGCTATCC               |
| RW29   | <i>chiA</i> qPCR R  | TTAGCCGTTCCCTCGATATG               |
| RW30   | <i>legP</i> qPCR F  | ATGAGCAATCCCGATCAGAC               |
| RW31   | <i>legP</i> qPCR R  | TCACCGAAATCTTTCCCATC               |
| RW32   | <i>plaC</i> qPCR F  | TTGTCTCTCCCTTTGGTTGG               |
| RW33   | <i>plaC</i> qPCR R  | AAAACGCAGGATCCTCTTCC               |
| RW34   | <i>plaC</i> qPCR F  | AACAGTTTTGCCAGGAATGC               |
| RW35   | <i>plaC</i> qPCR R  | CTTTTGCAATCCCTGATTCCG              |
| RW36   | <i>plcB</i> qPCR F  | GGTCATCTTAGACGCCATGC               |

|      |                    |                                                |
|------|--------------------|------------------------------------------------|
| RW37 | <i>plcB</i> qPCR R | AGTCGGGAAACACATCCATC                           |
| RW38 | <i>lspD</i> qPCR F | GCCGCGAGCTATATCAAGTC                           |
| RW39 | <i>lspD</i> qPCR R | TCATATCGTCACCTCGTGGA                           |
| RW40 | <i>lspE</i> qPCR F | AGCTATCGCTCCTTTGGTCA                           |
| RW41 | <i>lspE</i> qPCR R | CCACTCGTTCTCCATGGTTT                           |
| RW42 | <i>map</i> qPCR F  | ATGAGCGCCCAGTCATTGTT                           |
| RW43 | <i>map</i> qPCR R  | AGACGGTGCCTAAATACGG                            |
| RW44 | <i>proA</i> qPCR F | ACTCCCGACACTCAATCGAC                           |
| RW45 | <i>proA</i> qPCR R | AACCTGCATACAATGCGTCA                           |
| RW46 | <i>csrA</i> qPCR F | AGGCAATCAAGTTCGCTTAGG                          |
| RW47 | <i>csrA</i> qPCR R | CTGCTTGTTCCGAATCATCAGA                         |
| RW48 | <i>lspG</i> qPCR F | GGATGAAGCCCGTAAAGTCA                           |
| RW49 | <i>lspG</i> qPCR R | GGAACAGGATTGCTTGTGG                            |
| RW50 | <i>lspC</i> qPCR F | ATCTGCCAGTGGGGAAGAA                            |
| RW51 | <i>lspC</i> qPCR R | AAGGCTTAGCGACAGGTTCA                           |
| RW52 | <i>lspL</i> qPCR F | ACTGGTTTGCCTAGCATCT                            |
| RW53 | <i>lspL</i> qPCR R | AGGCGACAGGTATTTTGCTG                           |
| RW54 | <i>gamA</i> qPCR F | CGTTATCCCGGCGATACTTA                           |
| RW55 | <i>gamA</i> qPCR R | TTCGGGGACAGATTATGAGC                           |
| RW56 | LPW16991 qPCR F    | GATTCCGGCCTAAAGGAAAC                           |
| RW57 | LPW16991 qPCR R    | GCTGCACCCTTGCTTTTAAC                           |
| RW58 | <i>gyrB</i> qPCR F | AATCCCCTGCAGCAAAATC                            |
| RW59 | <i>qyrB</i> qPCR R | TGGTAAACCGGCAATATCCA                           |
| RW60 | <i>flaA</i> qPCR F | GGTTGGGGCGAATCAAACC                            |
| RW61 | <i>flaA</i> qPCR R | GTTGCTGCTCCTCCTCCAAT                           |
| RW62 | <i>nttB</i> qPCR F | TGCGTGAACAGCTGTCAGAA                           |
| RW63 | <i>nttB</i> qPCR R | TGGCGTTAACTGCATTCCCA                           |
| RW64 | <i>nttC</i> qPCR F | GCCTACATAGCAGGCAGCAT                           |
| RW65 | <i>nttC</i> qPCR R | GCAGGGCATTGACCATTAGT                           |
| RW66 | <i>nttA</i> qPCR F | TCCAATGCTGAGGACACAGC                           |
| RW67 | <i>nttA</i> qPCR R | GCATGCTGGCATAACAGTTCA                          |
| RW68 | <i>nttD</i> qPCR F | AATGATCGCGGCGAAAACCTG                          |
| RW69 | <i>nttD</i> qPCR R | CTTACCGGGTTCAAGCCACT                           |
| JG1  | FL-LapA F          | GACGACGACAAGATGACGACGTCGCCTGTTTCATG            |
| JG2  | FL-LapA R          | GAGGAGAAGCCCGGTTATTACTCGGAAGCGAGTTCAATAGC      |
| JG3  | dN-LapA F          | GACGACGACAAGATGGGTGTATCCAAATTACATAAAGACGTTTATG |
| JG4  | dN-LapA R          | GAGGAGAAGCCCGGTTATTACTCGGAAGCGAGTTCAATAGC      |
| JG5  | FL-LapB F          | GACGACGACAAGATGCAGTCCCCTGAAGAAGATAGAATC        |

|     |           |                                                |
|-----|-----------|------------------------------------------------|
| JG6 | FL-LapB R | GAGGAGAAGCCCGGTTACTAATTTAAACCAAGCTCTACAATAAAGG |
| JG7 | FL-NttD F | GACGACGACAAGATGTTTACATTACCAAGACAACCAACCAAATC   |
| JG8 | FL-NttD R | GAGGAGAAGCCCGGTTAATCCACTAACTGACTAAGCTTGAC      |

\* Restriction sites are underlined

**Table S3B:** Plasmids used in this study

| Plasmid     | Description                                                | Reference                                               |
|-------------|------------------------------------------------------------|---------------------------------------------------------|
| pGEM-T Easy | mutagenizing vector backbone (Amp <sup>R</sup> )           | Promega                                                 |
| pGnttDa     | pGEM containing 5' <i>nttD</i> (Amp <sup>R</sup> )         | this study                                              |
| pGnttDb     | pGEM containing 3' <i>nttD</i> (Amp <sup>R</sup> )         | this study                                              |
| pX1918-GT   | Gentamicin cassette donor vector                           | Tyson JY et al. Infect Immun. 2013;81:1399-410          |
| pGnttD::Gt  | <i>nttD</i> mutagenizing plasmid (Gent <sup>R</sup> )      | this study                                              |
| pGplaC::Kn  | <i>plac</i> mutagenizing plasmid (Kan <sup>R</sup> )       | McCoy-Simandle K et al. Infect Immun. 2011;79:1984-97   |
| pGplaC::Cm  | <i>plac</i> mutagenizing plasmid (Chloro <sup>R</sup> )    | Tyson JY et al. Infect Immun. 2013;81:1399-410          |
| pMMB2002    | complementation vector backbone (Chloro <sup>R</sup> )     | Rossier et al. Infect Immun. 2004;72:310-21             |
| pMnttD      | <i>nttD</i> complementation plasmid (Chloro <sup>R</sup> ) | this study                                              |
| pMMB-Gent   | complementation vector backbone (Gent <sup>R</sup> )       | Hammer BK and Swanson MS. Mol Microbiol. 1999;33:721-31 |
| pMlapA      | <i>lapA</i> complementation plasmid (Gent <sup>R</sup> )   | this study                                              |
| pMplaC      | <i>plac</i> complementation plasmid (Gent <sup>R</sup> )   | this study                                              |
